# Supplementary material
Source: Springer Nature journal article supplement (https://www.springermedizin.de/resource/supplementary/12885_2012_3389_MOESM5_ESM.pdf/9463306)

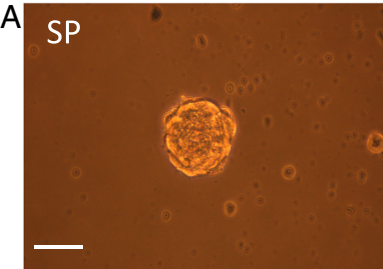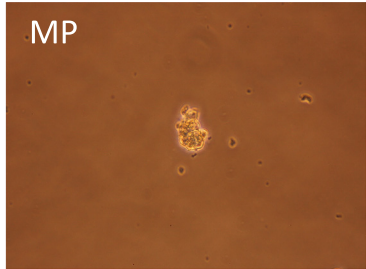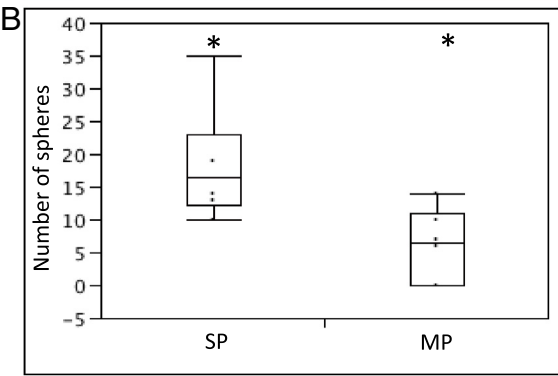

Supplement: MOESM5 [file 9463306]
